# Supplementary material
Source: PubMed Central journal article supplement (PMC7558457)
Supplement: NIHMS1635515-supplement-SI.pdf [file NIHMS1635515-supplement-SI.pdf]

## Supporting Information

### **Synthesis of 4-azido-*N*-acetylhexosamine uridine diphosphate donors: Clickable glycosaminoglycans**

Xing Zhang,<sup>†</sup> Dixy E. Green,<sup>‡</sup> Victor L. Schultz,<sup>†</sup> Lei Lin,<sup>†</sup> Xiaorui Han,<sup>†</sup> Ruitong  
Wang,<sup>†</sup> Alexander Yaksic,<sup>†</sup> So Young Kim,<sup>†</sup> Paul L. DeAngelis,<sup>\*\*‡</sup> and  
Robert J. Linhardt<sup>\*†</sup>

<sup>†</sup> Department of Chemistry and Chemical Biology, Center for Biotechnology and  
Interdisciplinary Studies, Rensselaer Polytechnic Institute, Troy, New York 12180,  
United States

<sup>‡</sup> Department of Biochemistry and Molecular Biology, University of Oklahoma  
Health Sciences Center, 940 Stanton L. Young Blvd., Oklahoma City, Oklahoma  
73126, United States

Authors to whom correspondence should be addressed at [linhar@rpi.edu](mailto:linhar@rpi.edu) and  
[Paul-Deangelis@ouhsc.edu](mailto:Paul-Deangelis@ouhsc.edu)

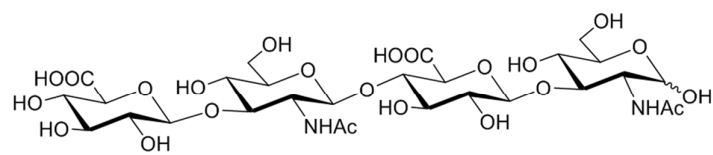

Hyaluronan tetrasaccharide (HA4)

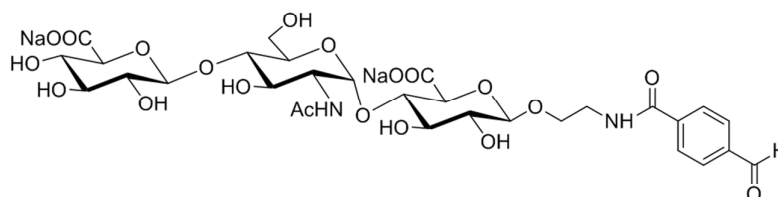

Heparosan trisaccharide-benzaldehyde (HEP3-Benz)

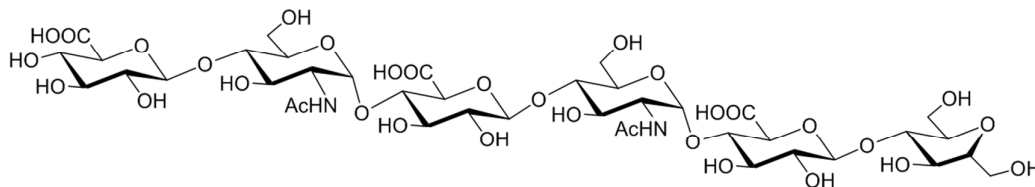

Heparosan hexasaccharide (HEP6)

Figure 1S. Structures of oligosaccharide acceptors in GAG synthase reactions

Scheme 1S. Enzymatic synthesis of azido-tagged pentasaccharide from hyaluronan tetrasaccharide

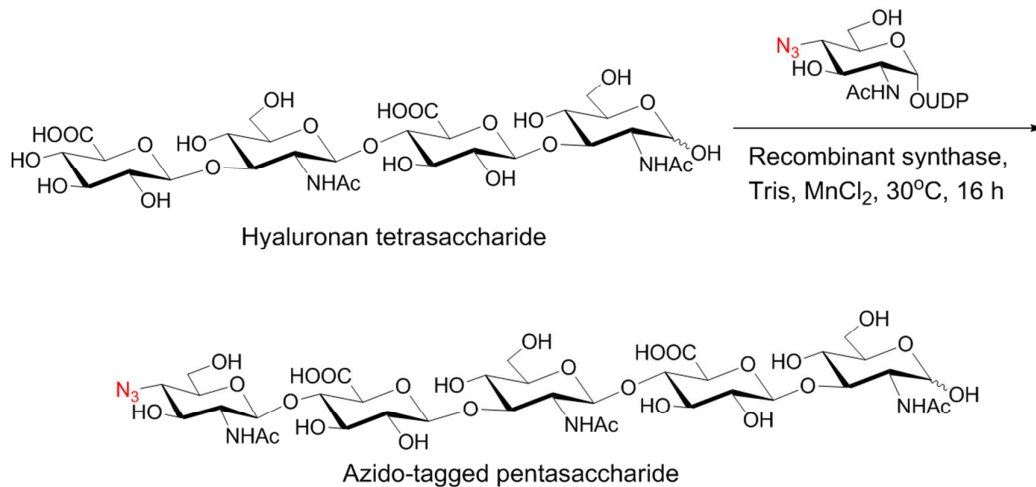

$^1\text{H}$  NMR spectrum (600 MHz,  $\text{CDCl}_3$ ) of compound **3a**

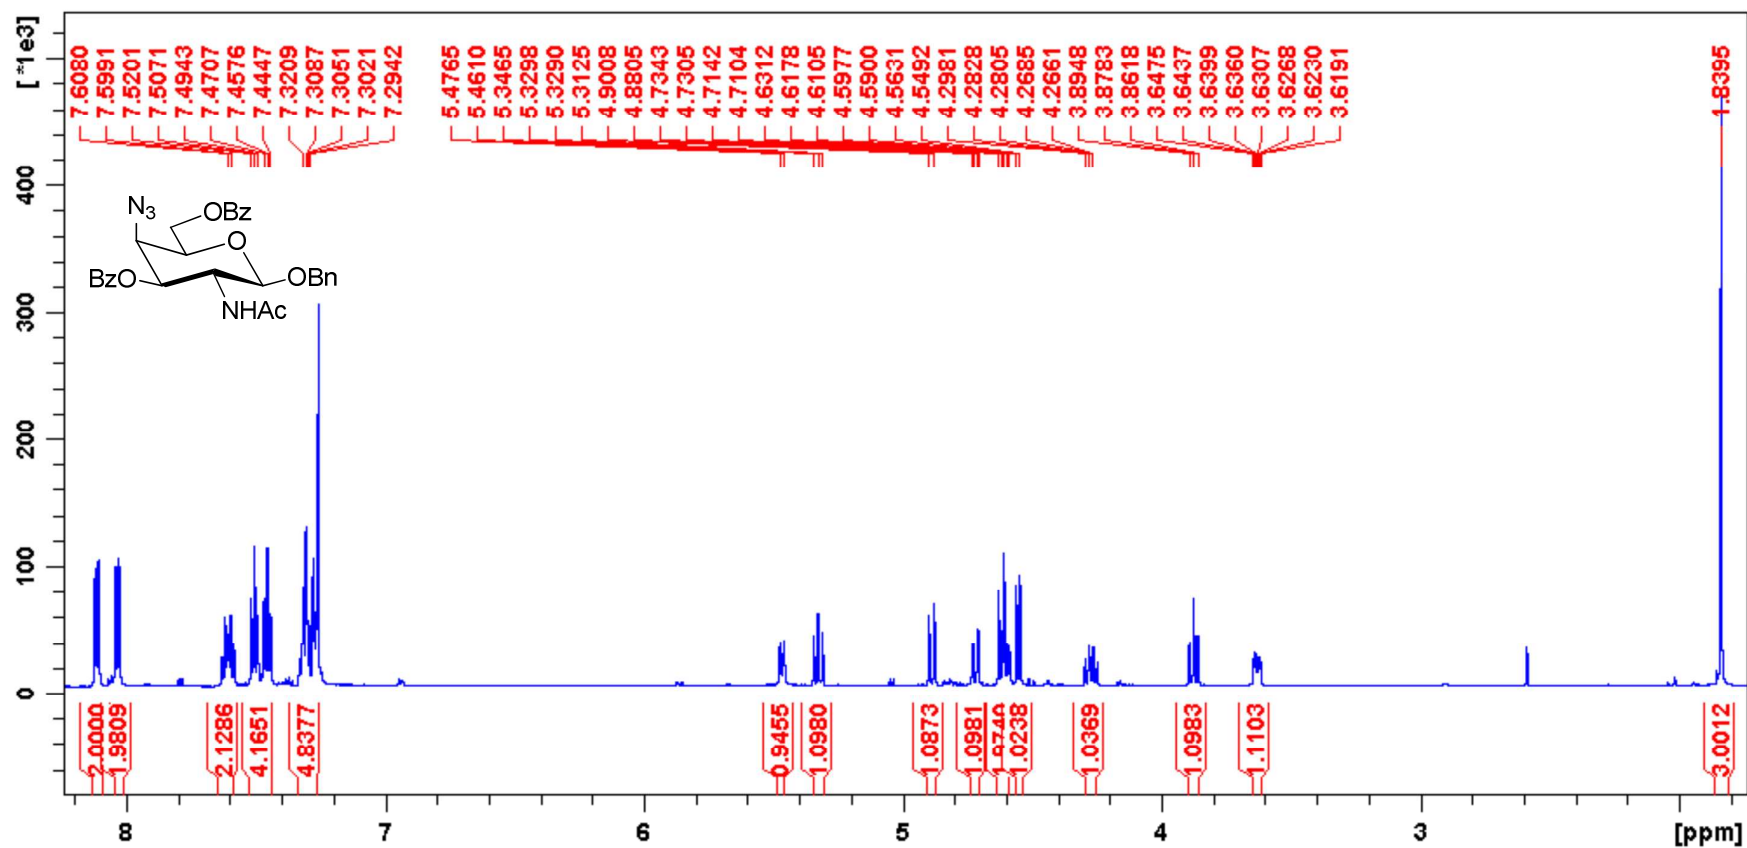

$^{13}\text{C}$  NMR spectrum (150 MHz,  $\text{CDCl}_3$ ) of compound **3a**

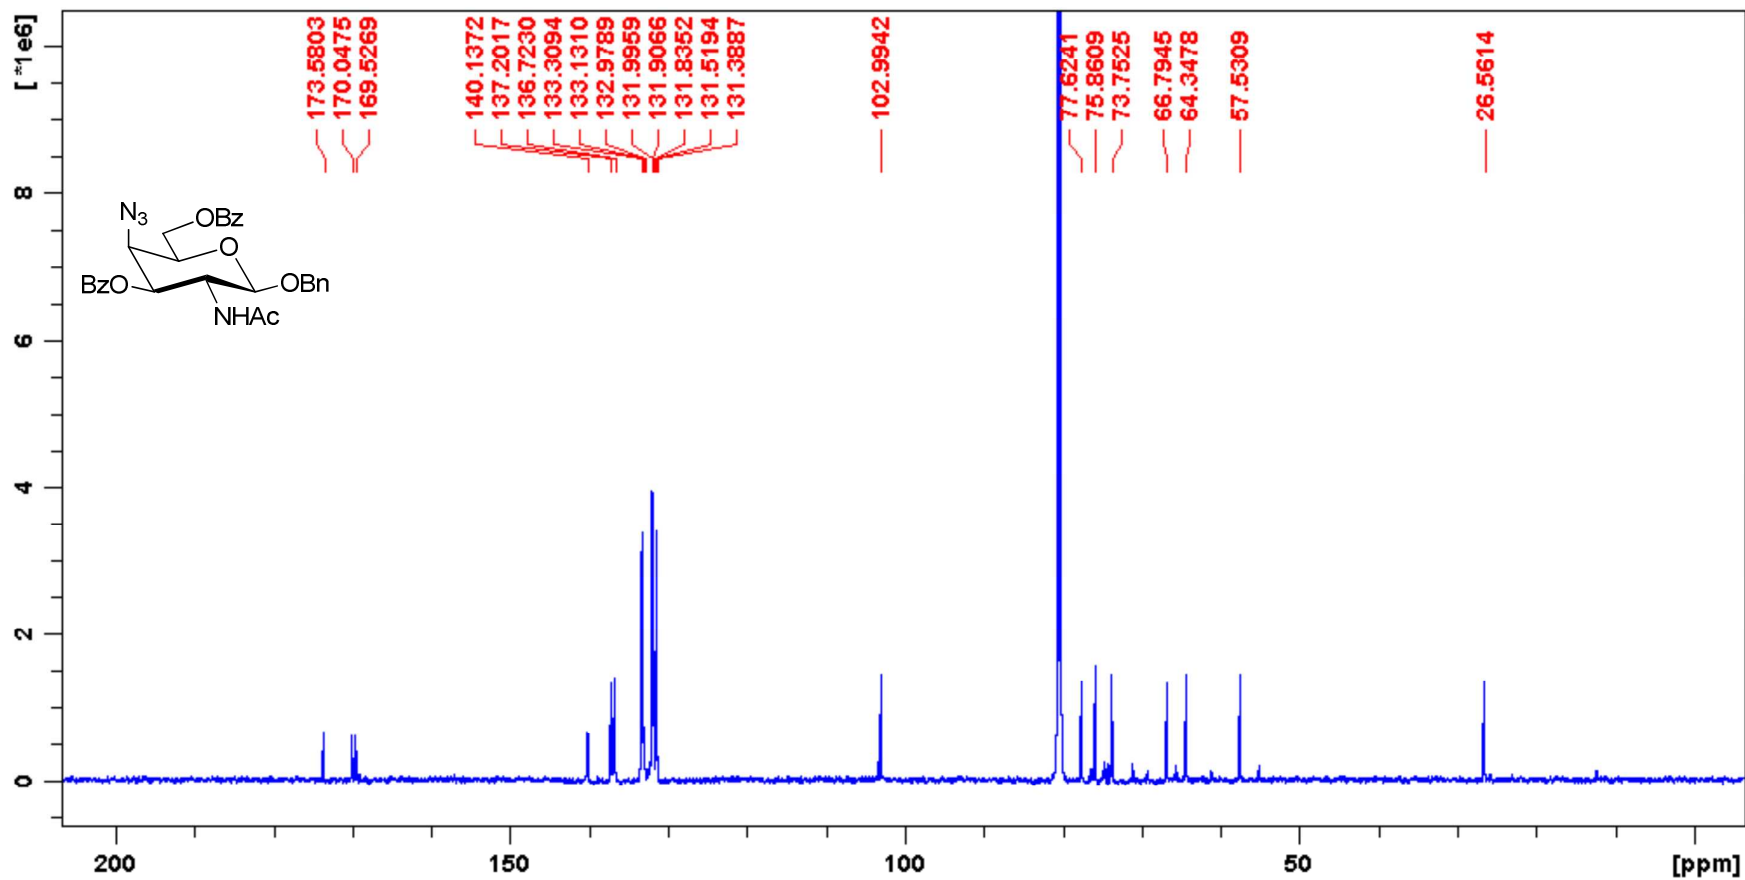



$^1\text{H}$  NMR spectrum (800 MHz,  $\text{CDCl}_3$ ) of compound **5a**

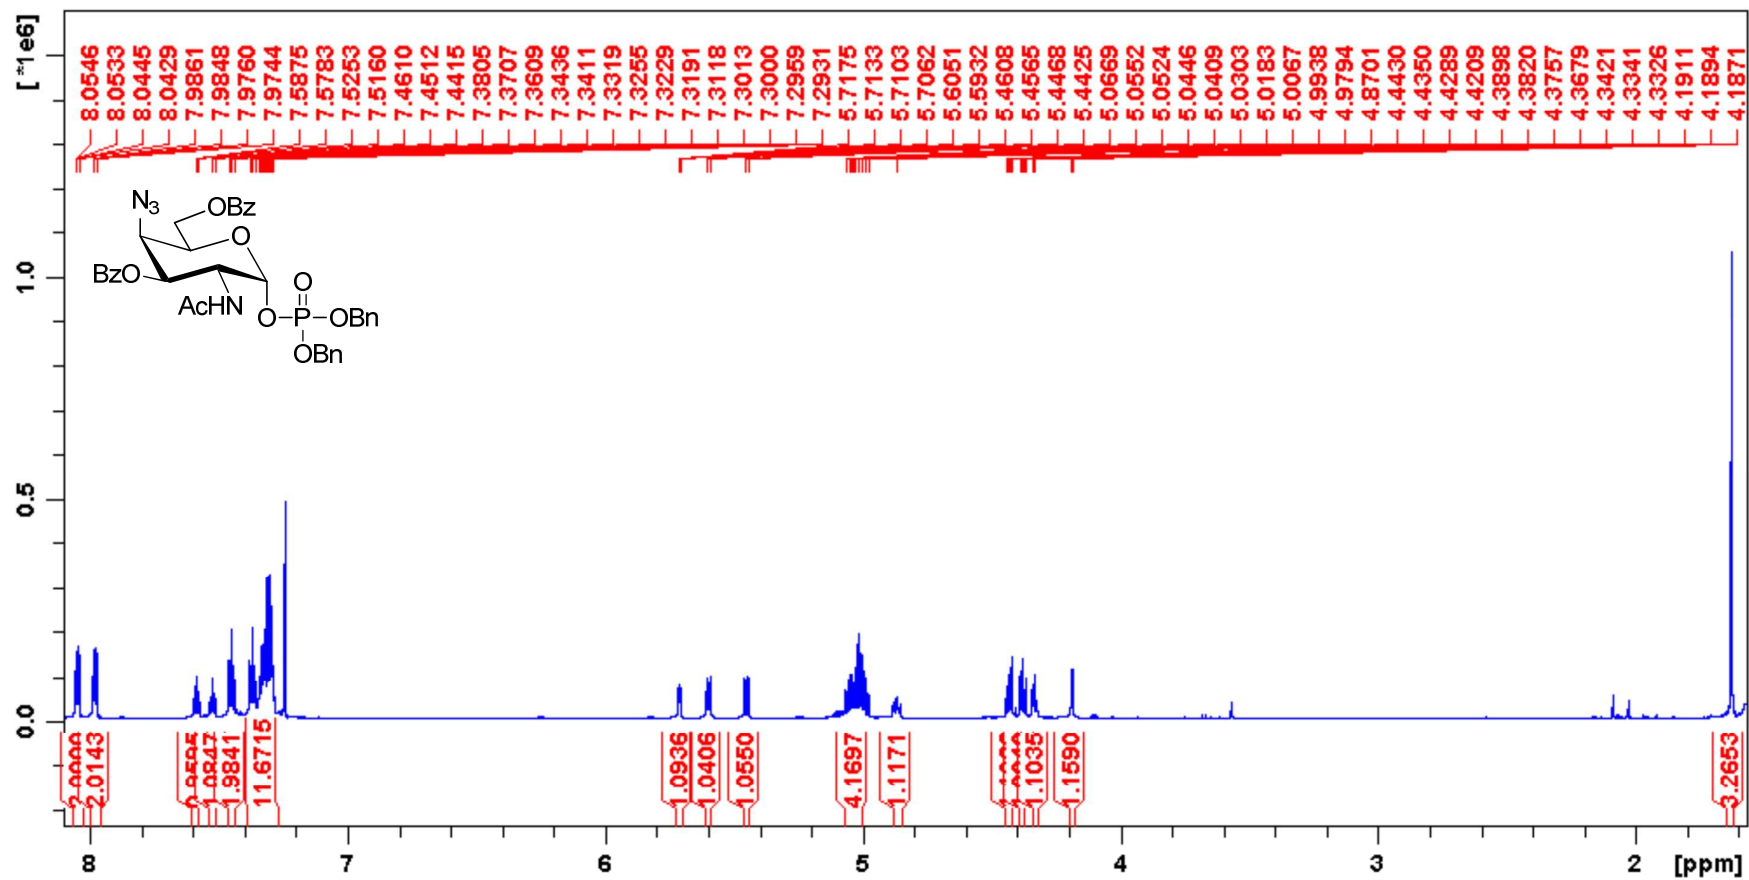

$^{13}\text{C}$  NMR spectrum (200 MHz,  $\text{CDCl}_3$ ) of compound **5a**

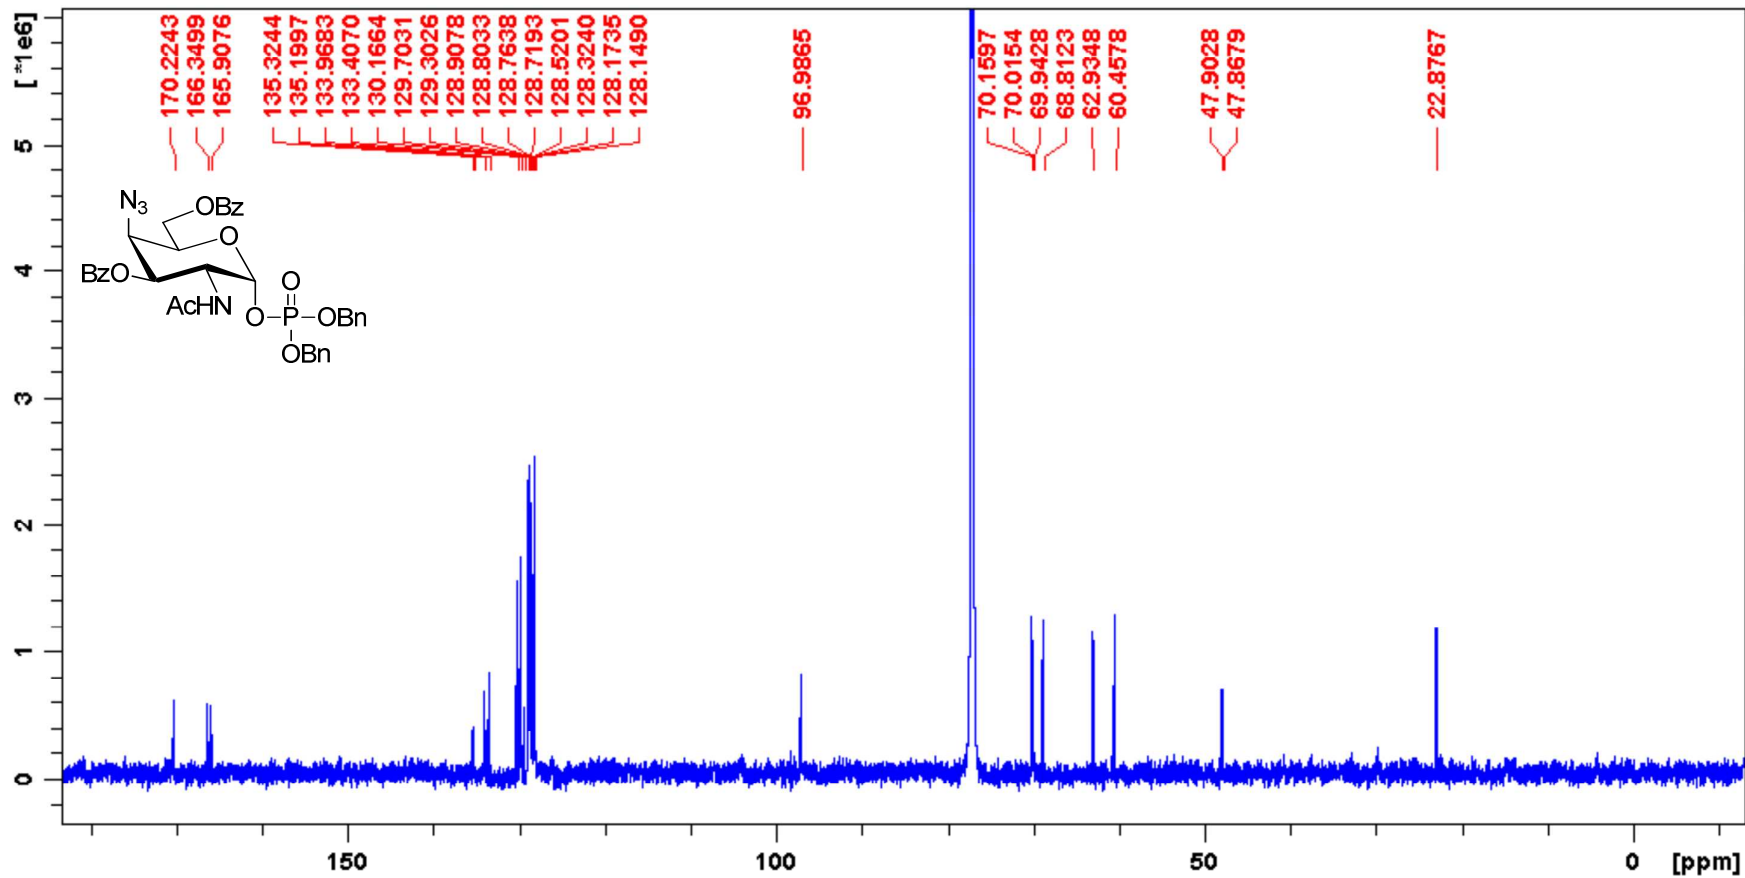

$^1\text{H}$  NMR spectrum (600 MHz,  $\text{CDCl}_3$ ) of compound **5b**

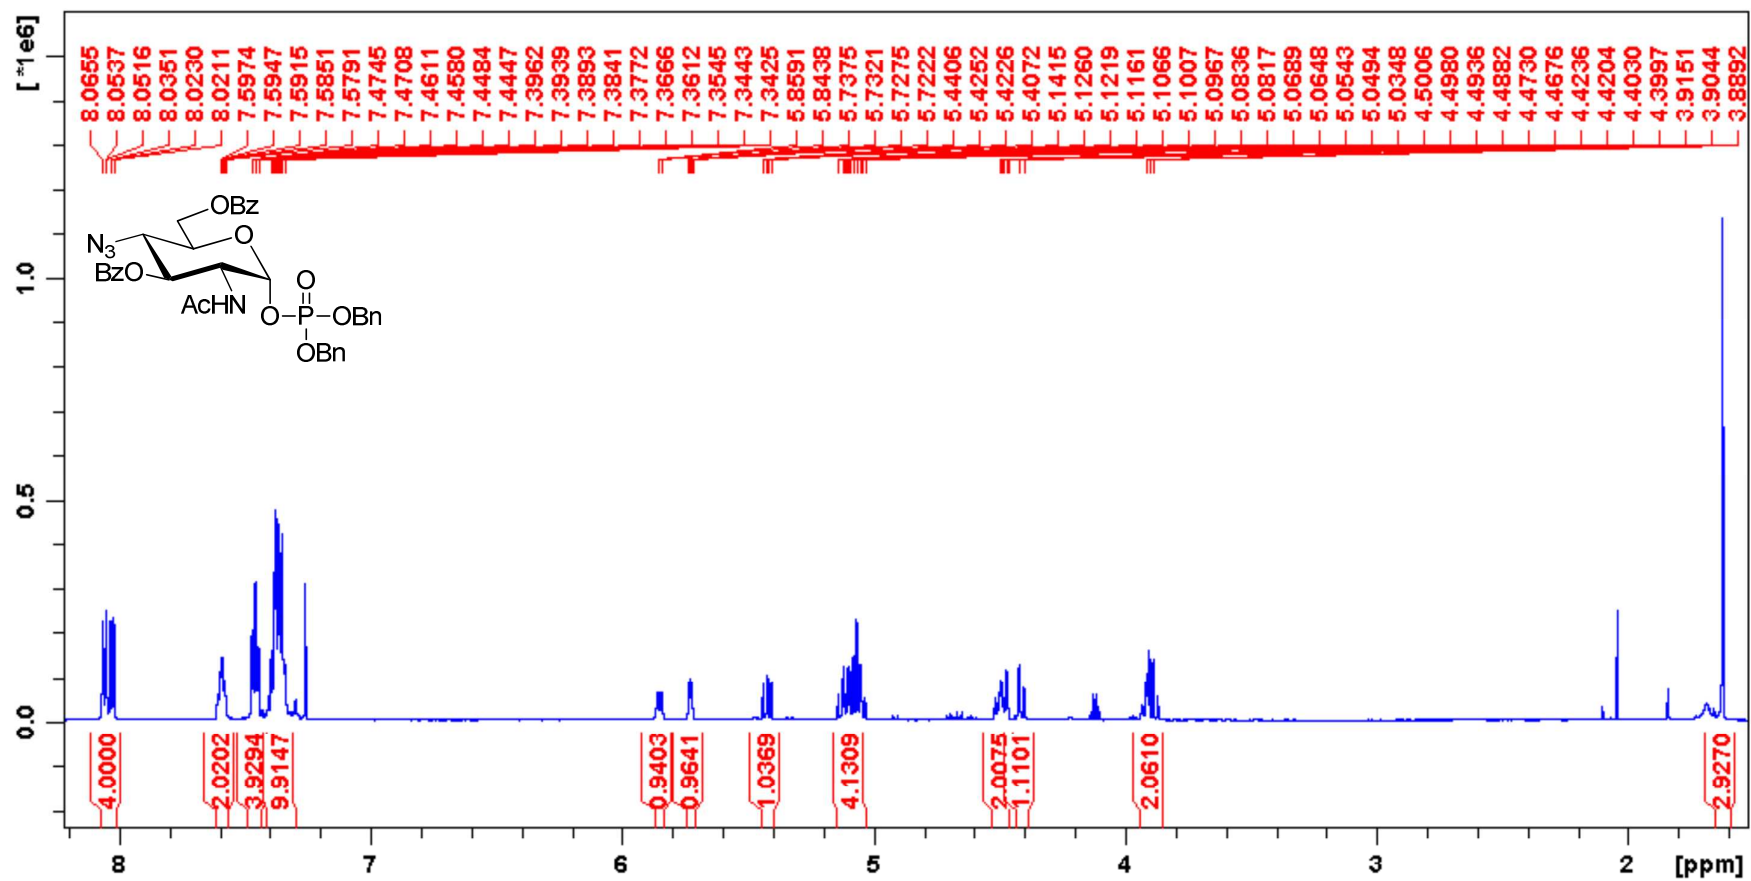



$^{13}\text{C}$  NMR spectrum (150 MHz,  $\text{CDCl}_3$ ) of compound **5b**

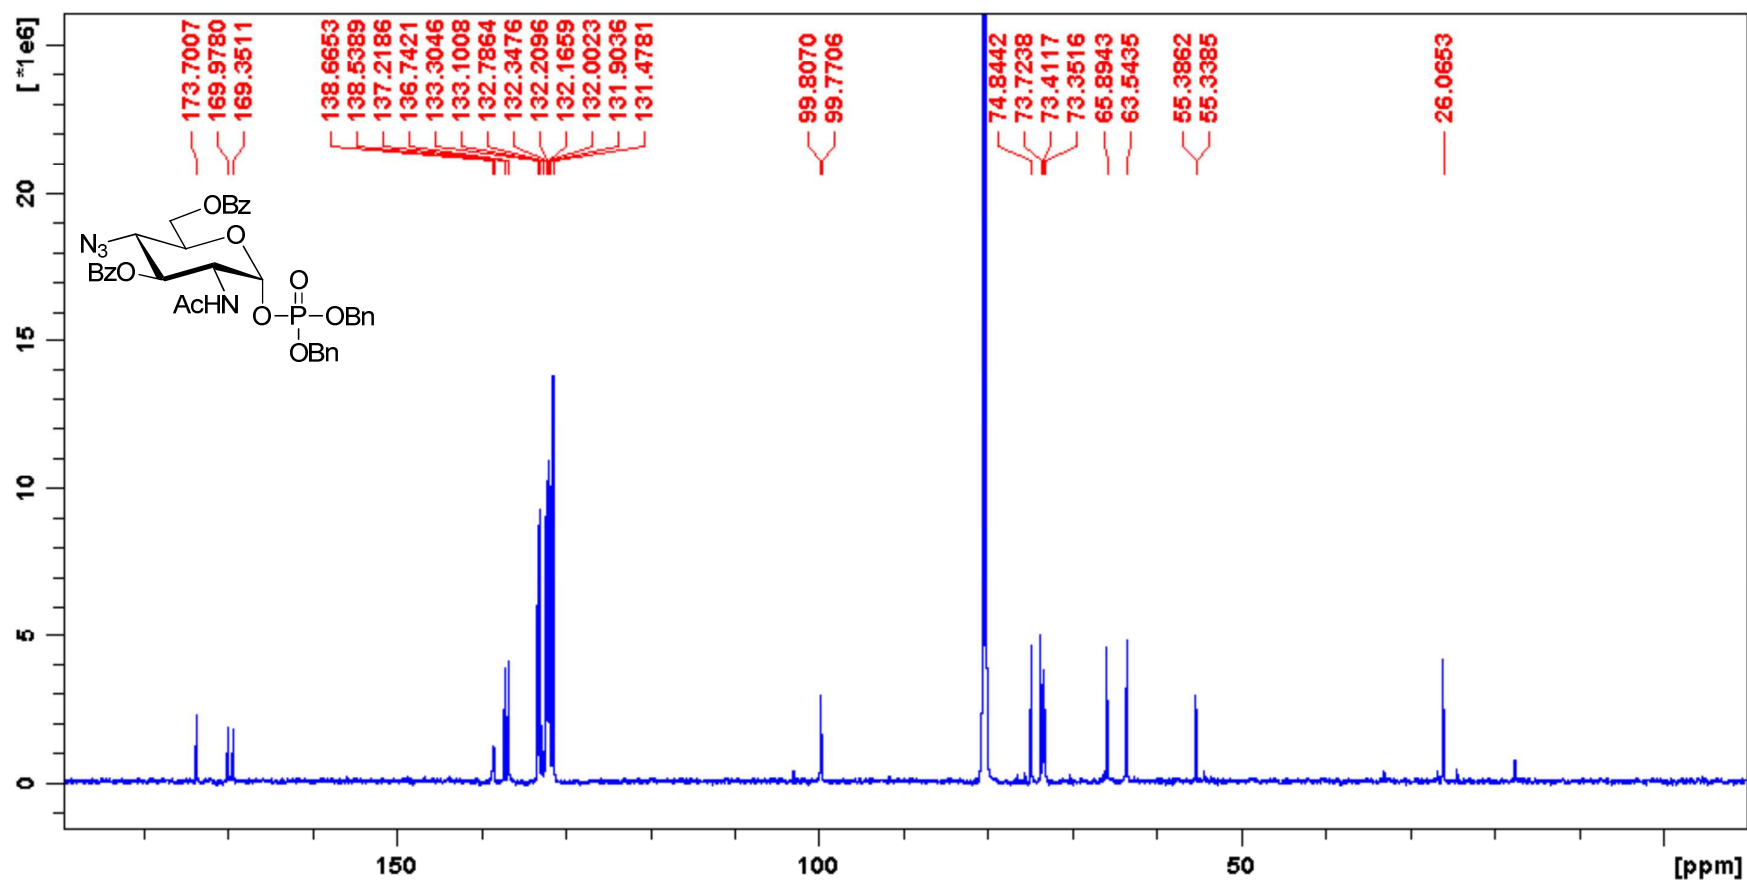

$^1\text{H}$  NMR spectrum (600 MHz,  $\text{D}_2\text{O}$ ) of compound **8b**

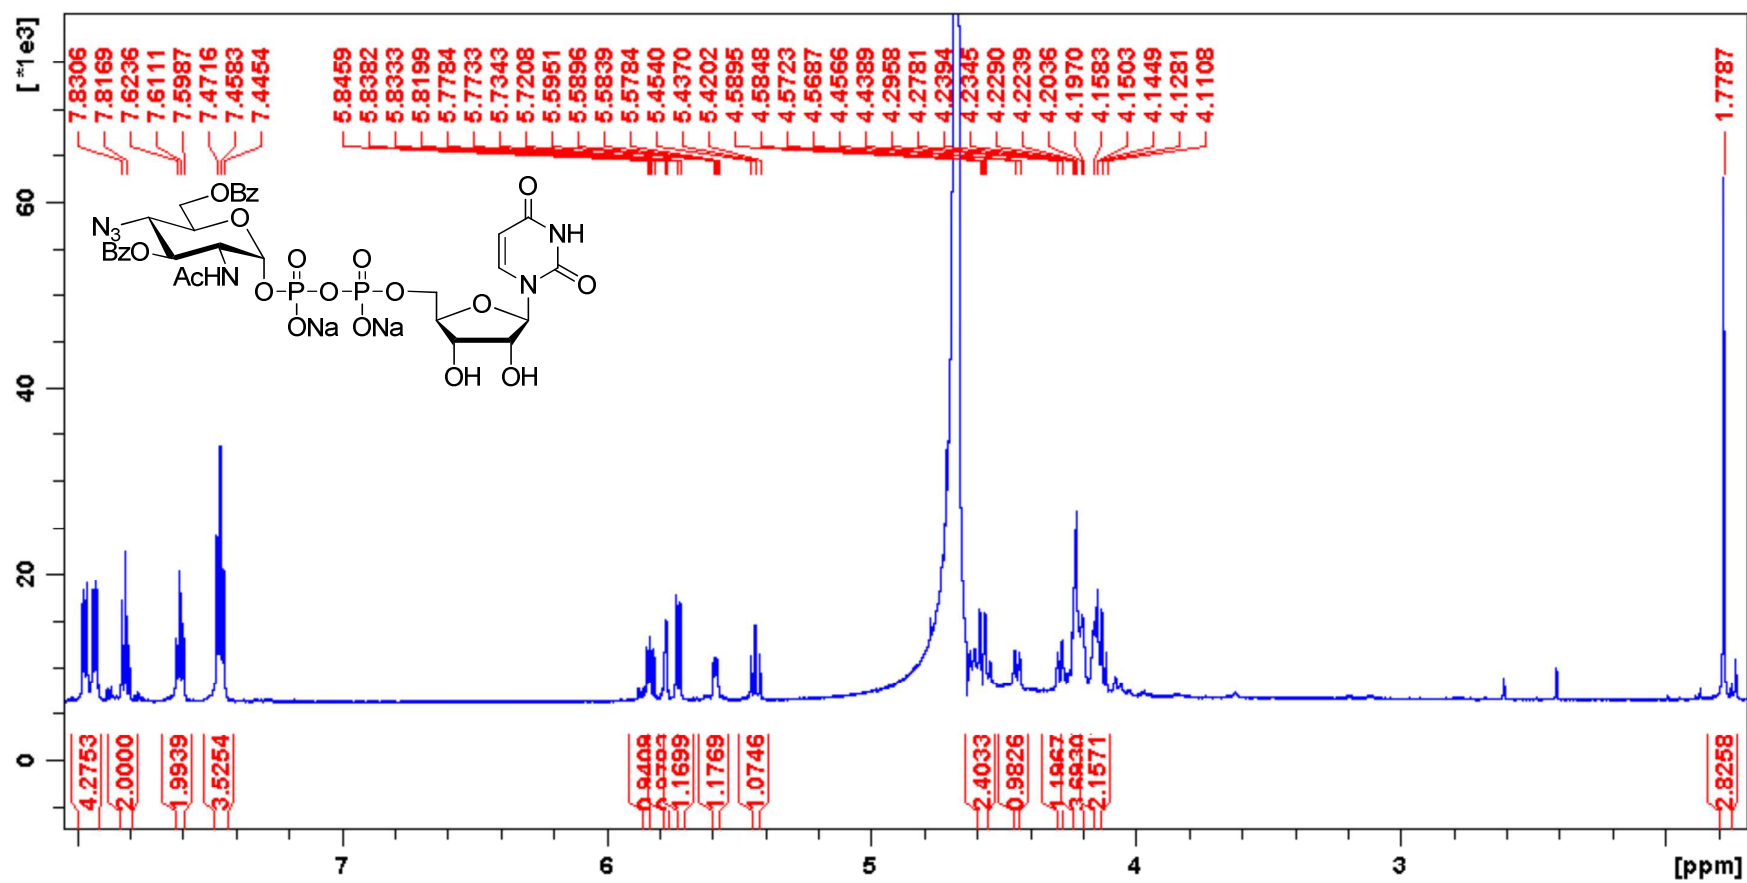

$^{13}\text{C}$  NMR spectrum (150 MHz,  $\text{D}_2\text{O}$ ) of compound **8b**

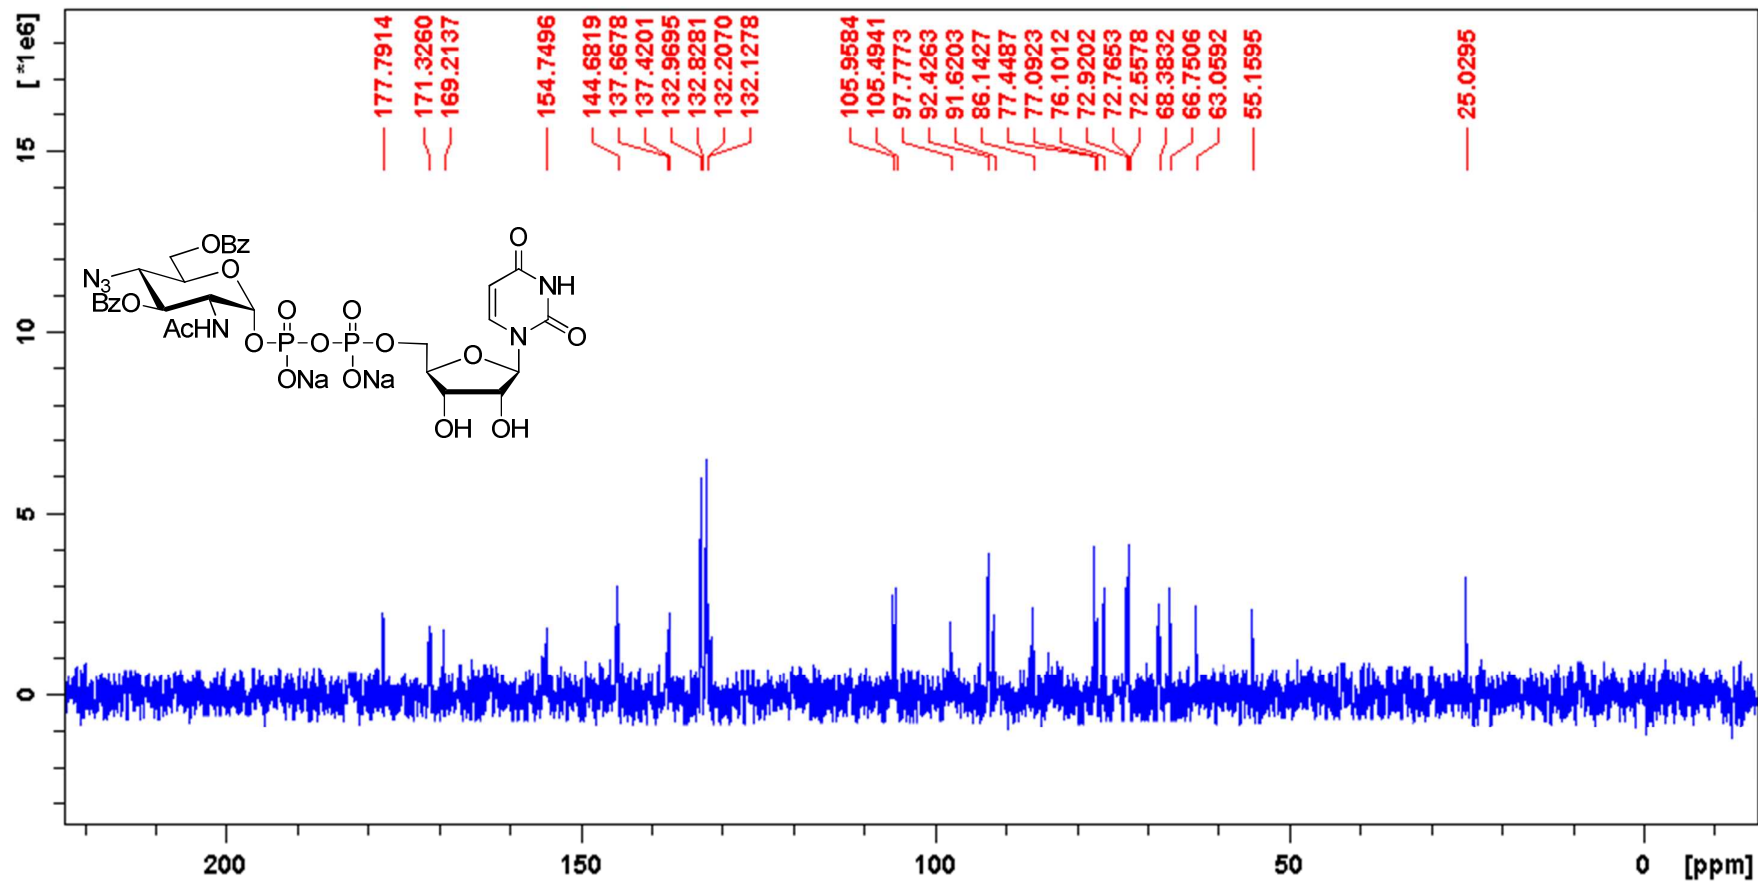

$^1\text{H}$  NMR spectrum (600 MHz,  $\text{D}_2\text{O}$ ) of compound **7b**

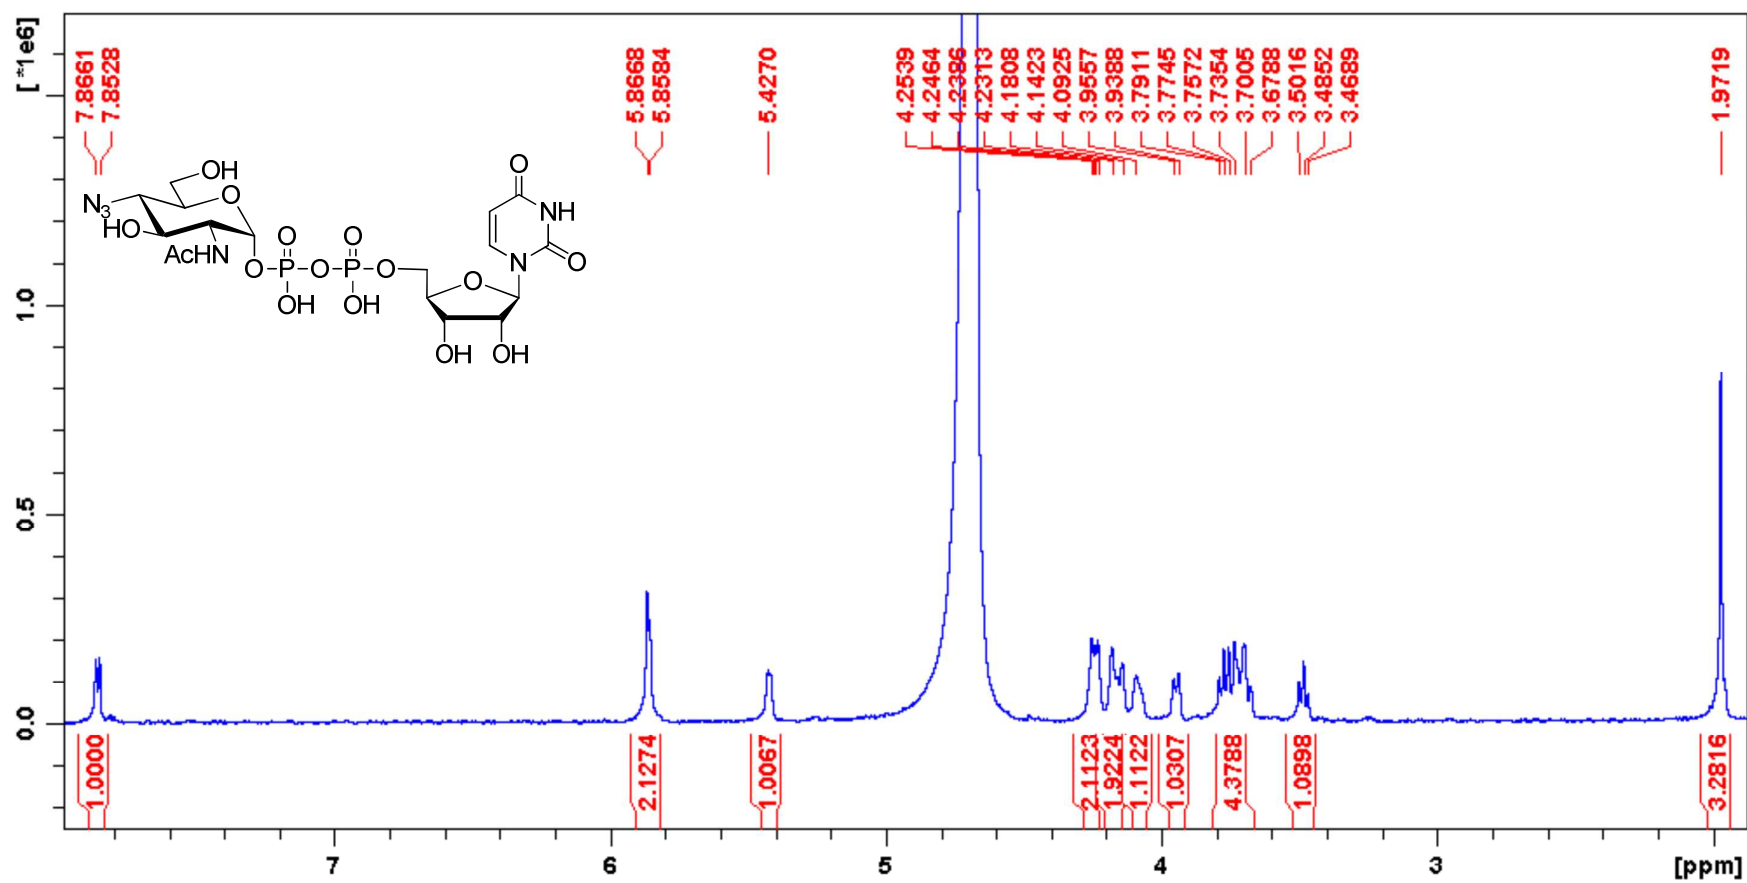

$^{13}\text{C}$  NMR spectrum (150 MHz,  $\text{D}_2\text{O}$ ) of compound **7b**

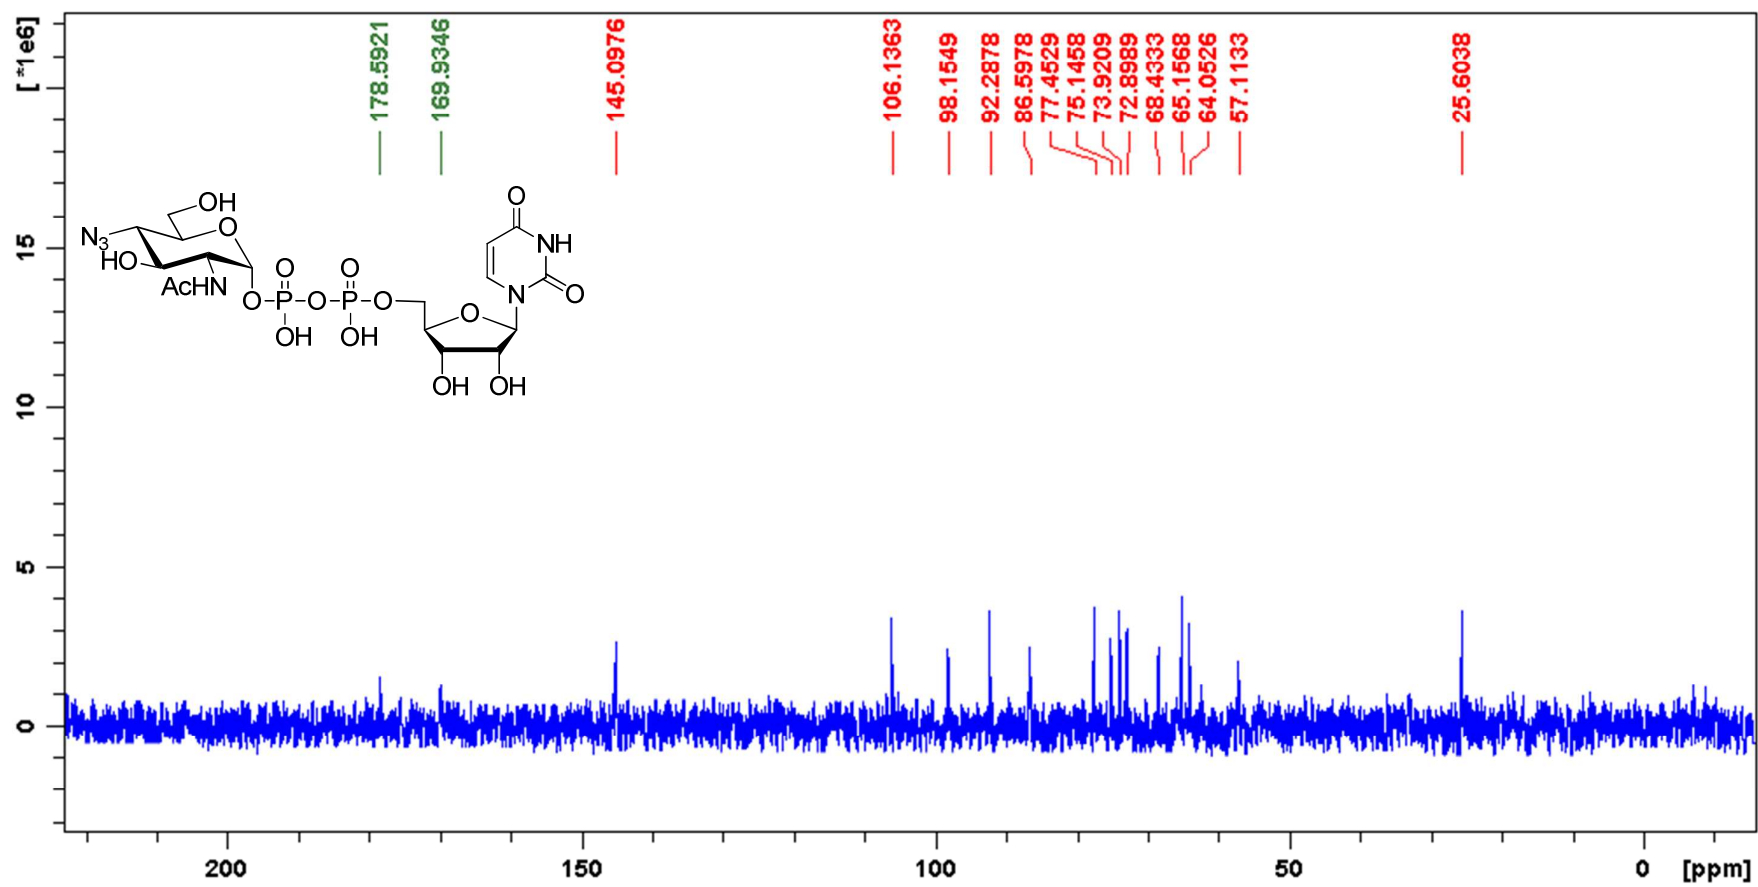

2D COSY NMR spectrum (600 MHz, D<sub>2</sub>O) of compound **7b**

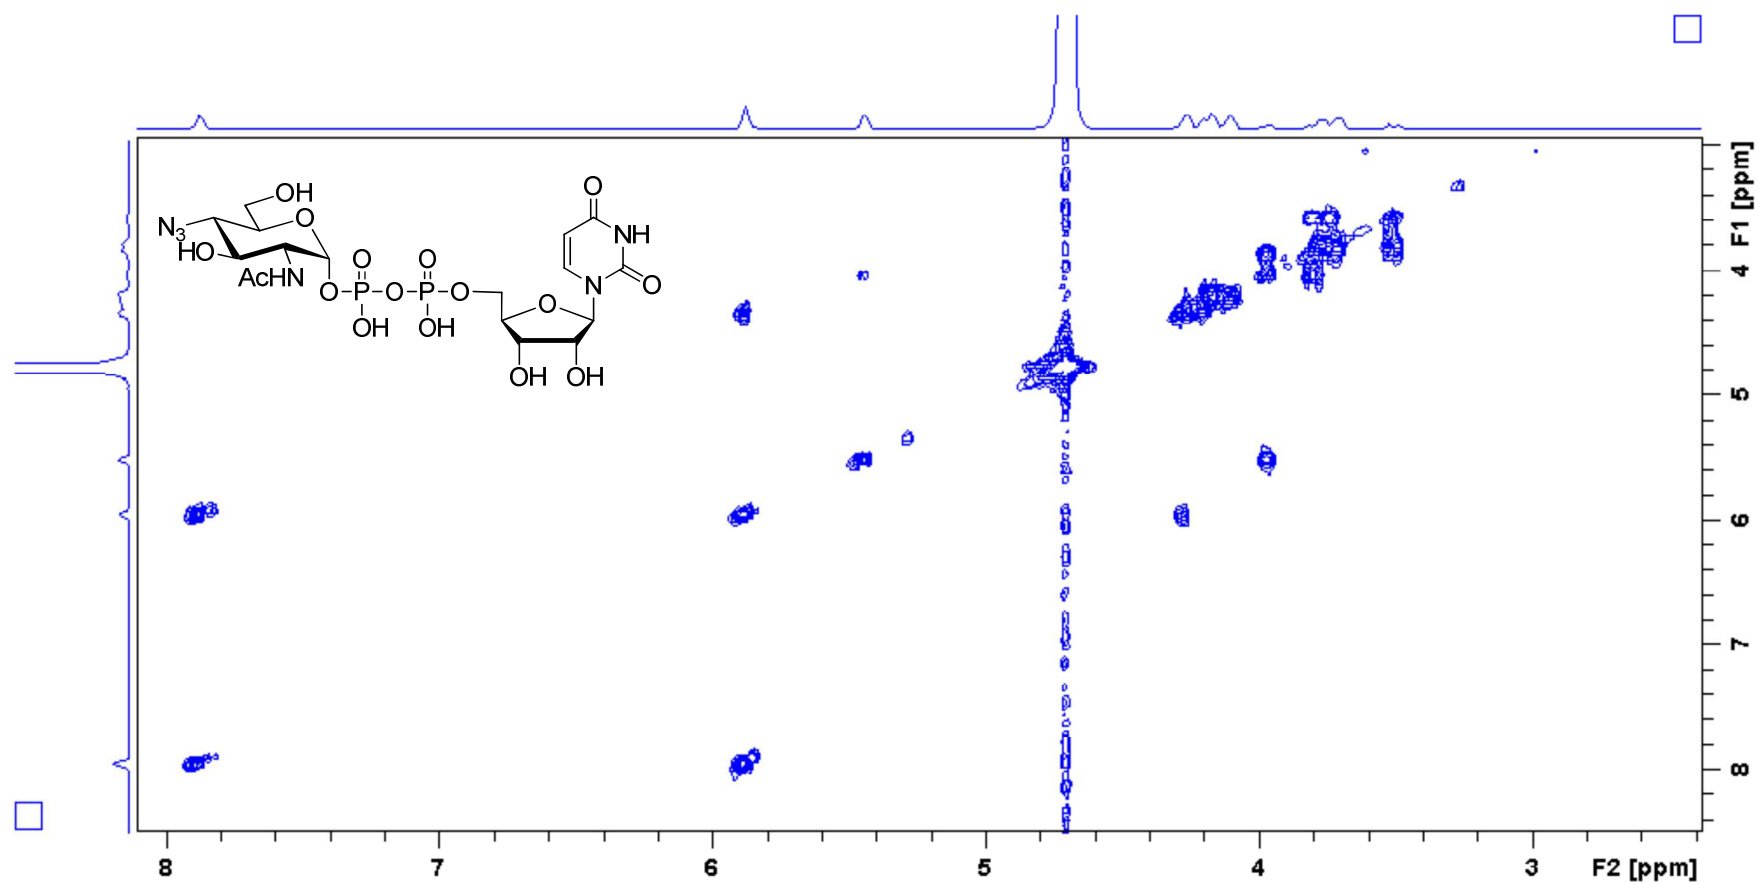

$^1\text{H}$  NMR spectrum (600 MHz,  $\text{D}_2\text{O}$ ) of compound **8a**

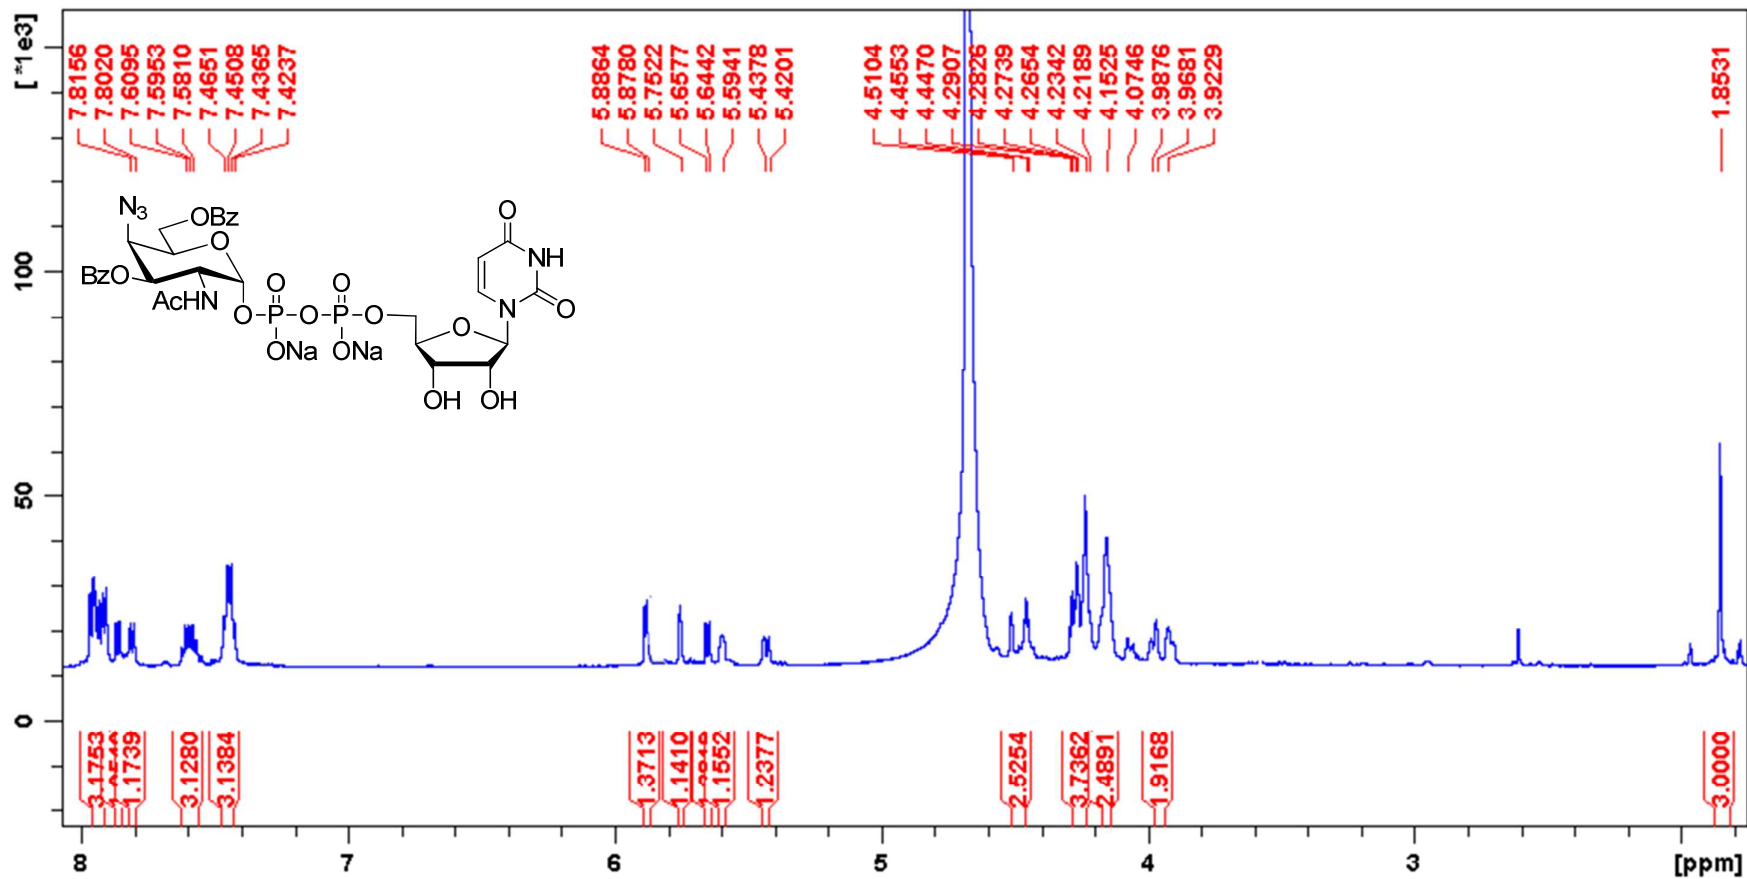

$^{13}\text{C}$  NMR spectrum (150 MHz,  $\text{D}_2\text{O}$ ) of compound **8a**

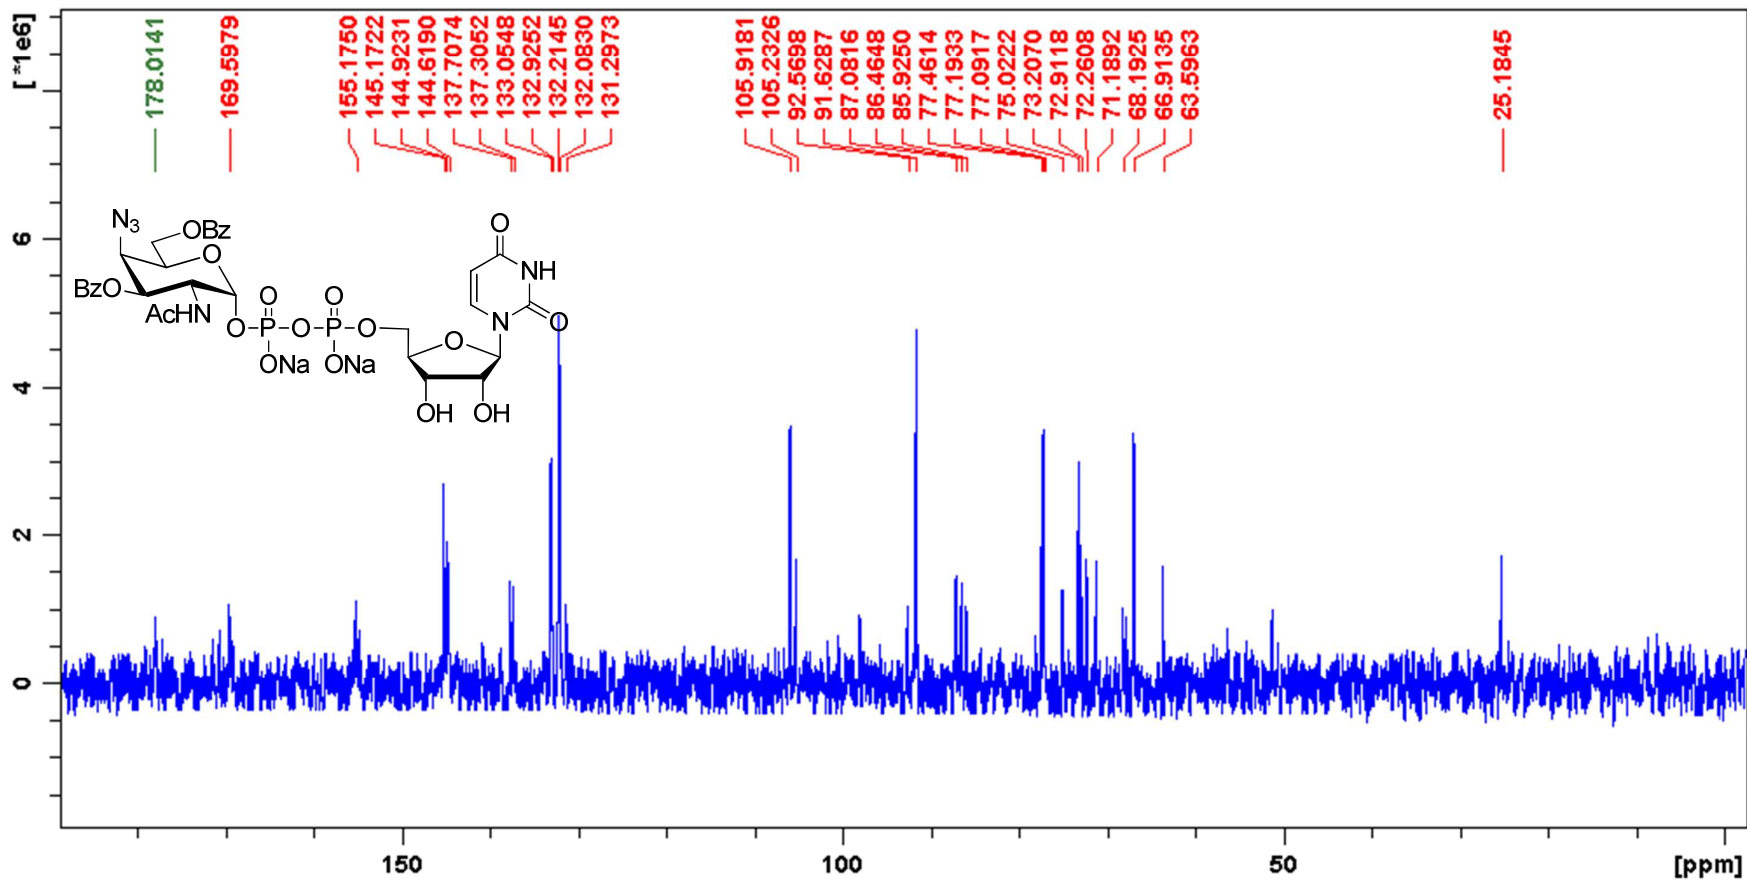



$^1\text{H}$  NMR spectrum (600 MHz,  $\text{D}_2\text{O}$ ) of compound **7a**

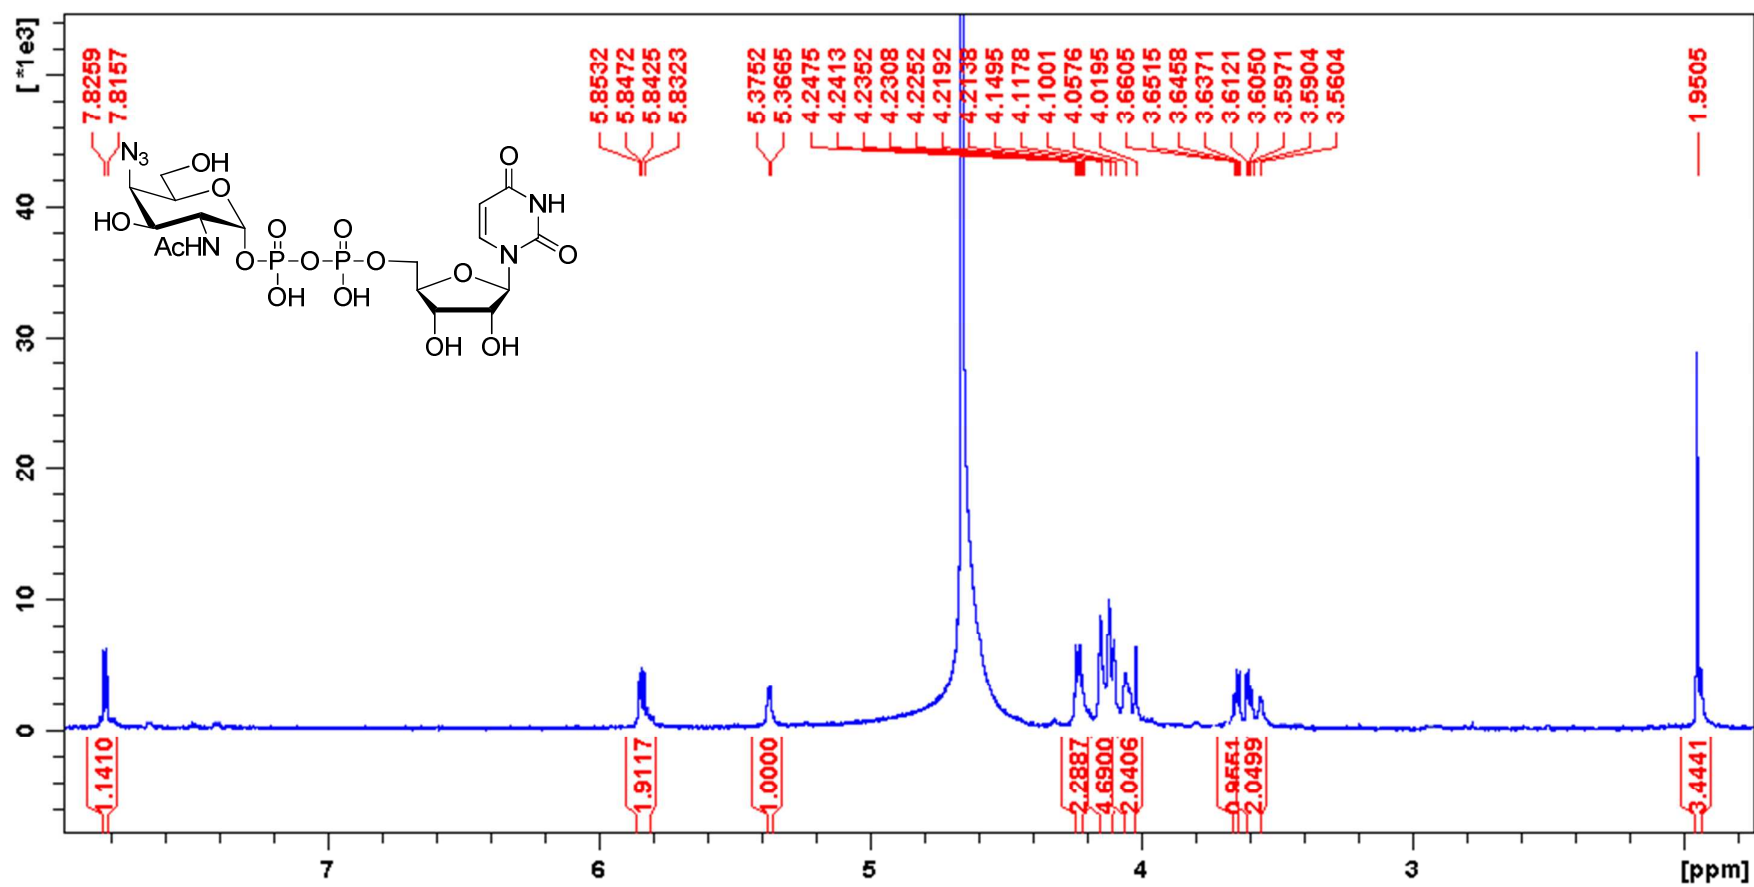

$^{13}\text{C}$  NMR spectrum (150 MHz,  $\text{D}_2\text{O}$ ) of compound **7a**

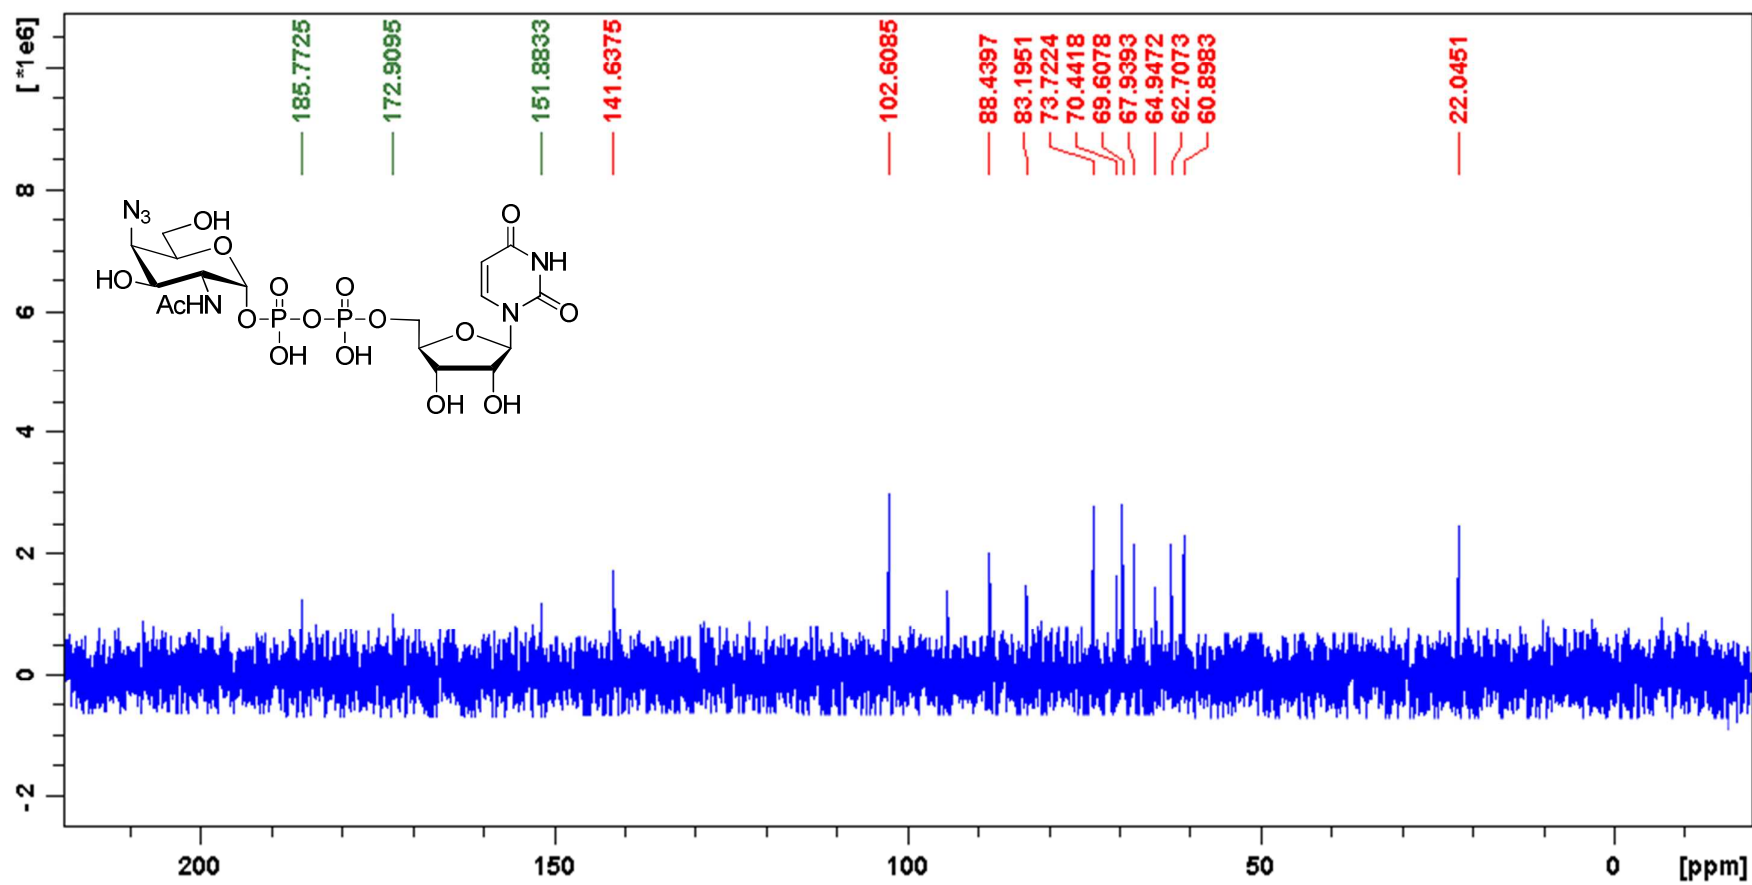

2D COSY NMR spectrum (600 MHz, D<sub>2</sub>O) of compound **7a**

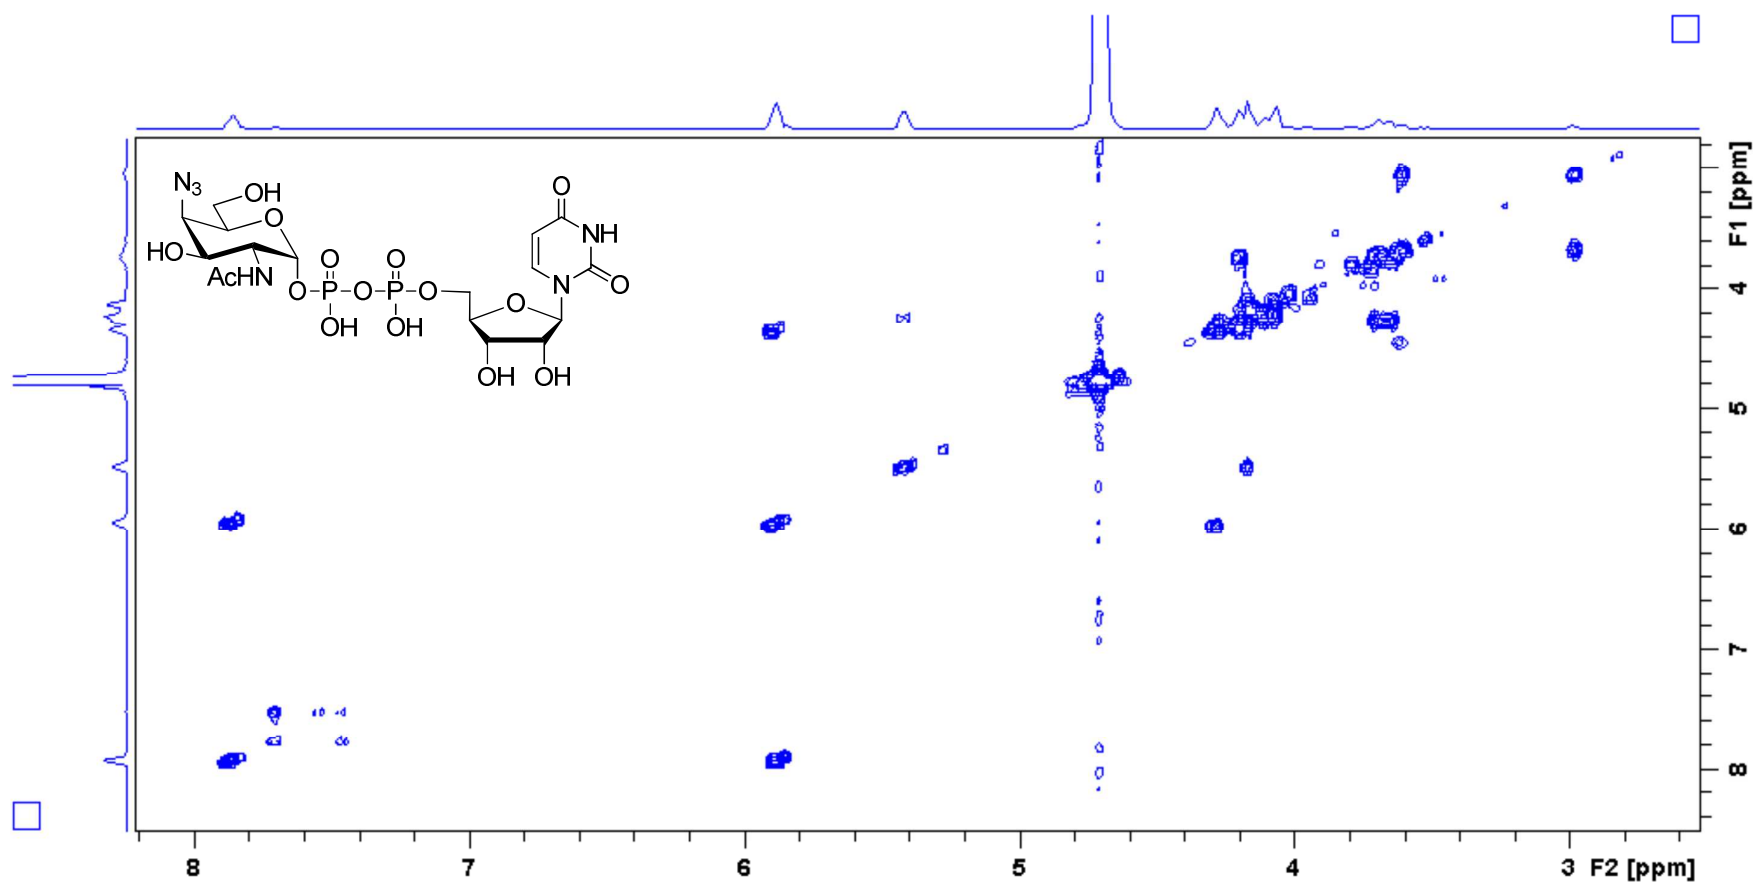

2D HSQC NMR spectrum (600 MHz, D<sub>2</sub>O) of compound **7a**

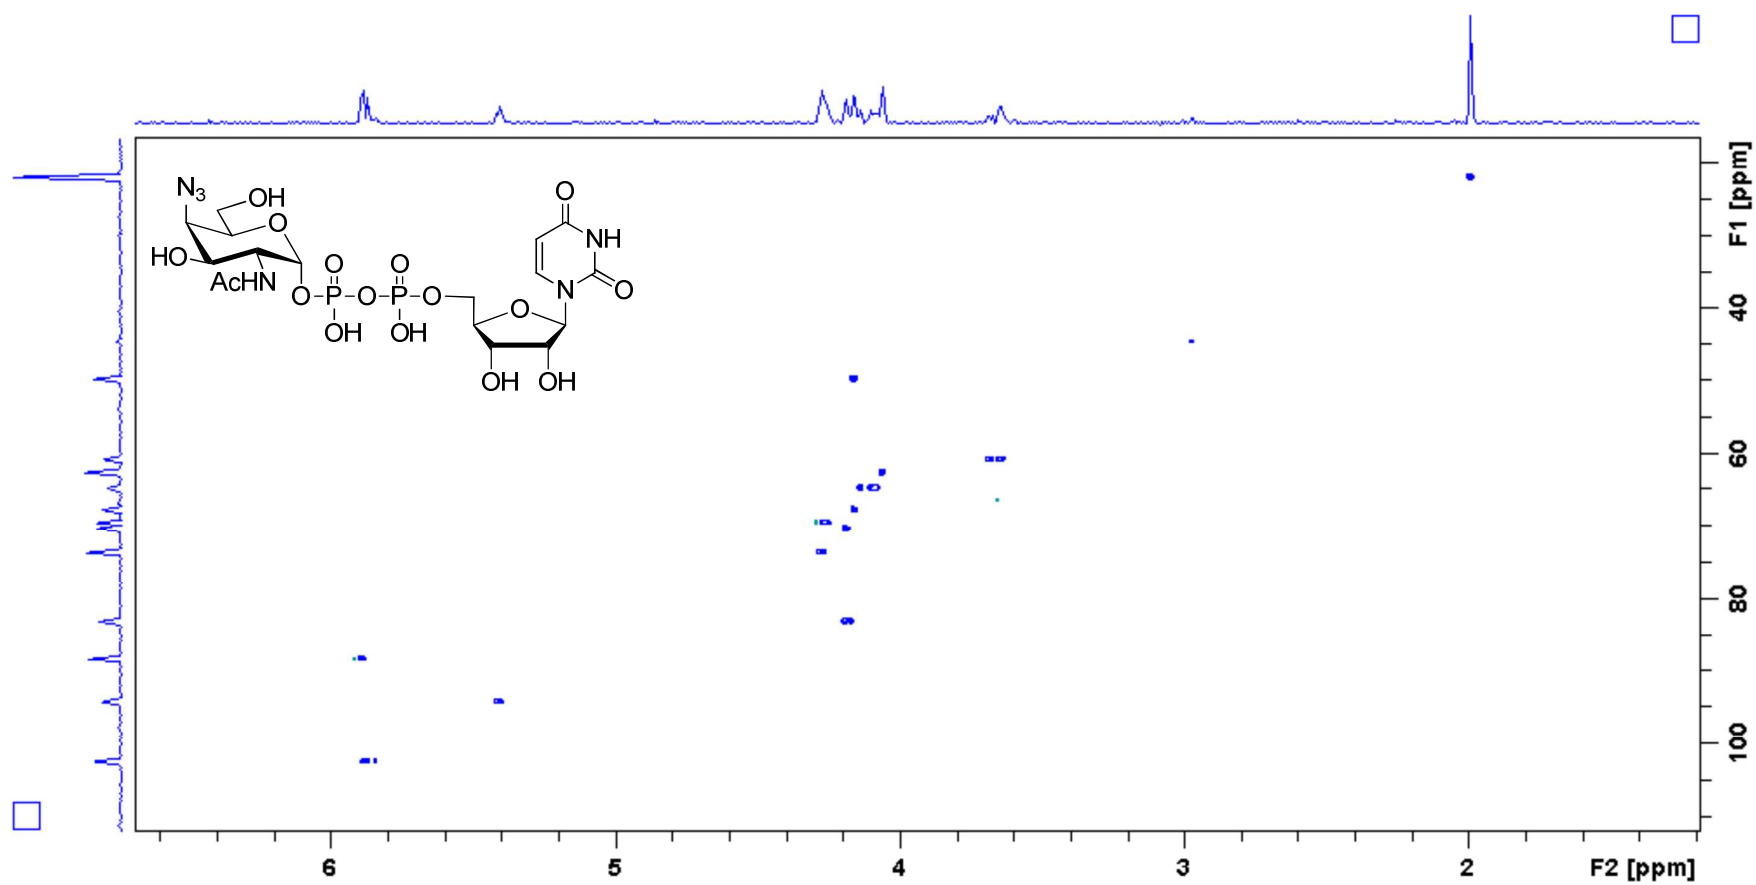

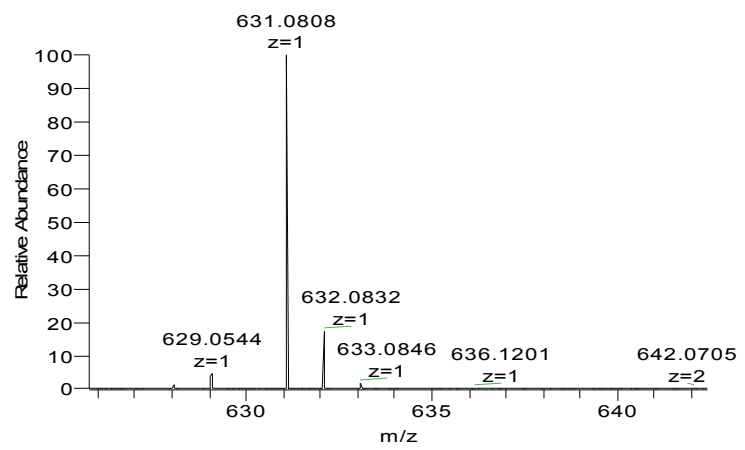

HRMS of compound 7a

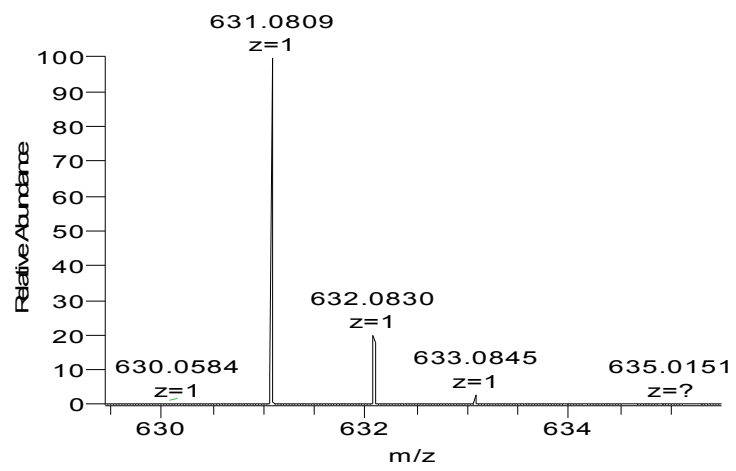

HRMS of compound 7b
